# Supplementary material
Source: publisher site journal article supplement (https://www.spandidos-publications.com/6061/downloadSupplementary)
Supplement: Supplementary file 1 [file downloadSupplementary]

Table I. Details of reliability assessment according to ToxRtool (21,25).

|     | Number of study                                                                                                                                                                           | 1                                 | 2                               | 3                                 | 4                                    |
|-----|-------------------------------------------------------------------------------------------------------------------------------------------------------------------------------------------|-----------------------------------|---------------------------------|-----------------------------------|--------------------------------------|
|     | Criteria                                                                                                                                                                                  | Bariani <i>et al</i> (8),<br>2017 | Deng <i>et al</i> (11),<br>2016 | Furuya <i>et al</i><br>(17), 2015 | Novaković <i>et al</i><br>(31), 2015 |
| No. | Criteria group I: Test substance identification                                                                                                                                           |                                   |                                 |                                   |                                      |
| 1.  | Was the test substance identified?                                                                                                                                                        | 1                                 | 1                               | 1                                 | 1                                    |
| 2.  | Is the purity of the substance given?                                                                                                                                                     | 1                                 | 0                               | 1                                 | 1                                    |
| 3.  | Is information on the source/origin of the substance given?                                                                                                                               | 1                                 | 0                               | 1                                 | 1                                    |
| 4.  | Is all information on the nature and/or physico-chemical properties of the test item given, which you deem <u>indispensable</u> for judging the data?                                     | 1                                 | 1                               | 1                                 | 1                                    |
|     | Subtotal Score I                                                                                                                                                                          | 4                                 | 2                               | 4                                 | 4                                    |
|     | Criteria group II: Test organism characterisation                                                                                                                                         |                                   |                                 |                                   |                                      |
| 5.  | Are the species (for <i>in vivo</i> studies) or the test system provided (for <i>in vitro</i> studies)?                                                                                   | 1                                 | 1                               | 1                                 | 1                                    |
| 6.  | Is the sex of the test organism (for <i>in vivo</i> studies) or the origin or source of the test system with the corresponding sex characteristic provided (for <i>in vitro</i> studies)? | 1                                 | 1                               | 1                                 | 1                                    |

|     |                                                                                                                                                                                                                                                  |   |   |   |   |
|-----|--------------------------------------------------------------------------------------------------------------------------------------------------------------------------------------------------------------------------------------------------|---|---|---|---|
| 7.  | Is information provided on the strain of test animals (for <i>in vivo</i> studies) or the specification of cell/tissue culture (for <i>in vitro</i> studies)?                                                                                    | 1 | 1 | 1 | 1 |
| 8.  | Is the age or body weight of the test organisms at the start of the study provided (for <i>in vivo</i> studies) or the age or other relevant clinical characteristics of human donors for cell/tissue cultivation (for <i>in vitro</i> studies)? | 0 | 0 | 0 | 0 |
| 9.  | For repeated dose studies: is information provided on the housing or feeding conditions (for <i>in vivo</i> studies) or the conditioning and maintenance of the cultivation process (for <i>in vitro</i> studies)?                               | 1 | 0 | 0 | 1 |
|     | Subtotal score II                                                                                                                                                                                                                                | 4 | 3 | 3 | 4 |
|     | Criteria group III: Study design description                                                                                                                                                                                                     |   |   |   |   |
| 10. | Is the method of administration given (see explanations for details)?                                                                                                                                                                            | 1 | 1 | 1 | 1 |
| 11. | Are doses administered or concentrations in application media given?                                                                                                                                                                             | 1 | 1 | 1 | 1 |
| 12. | Are frequency and duration of exposure as well as time-points of observations explained?                                                                                                                                                         | 1 | 1 | 1 | 1 |
| 13. | Were negative and positive controls included? (it can not be only including negative controls)                                                                                                                                                   | 0 | 0 | 0 | 0 |

|     |                                                                                                                                                           |   |   |   |   |
|-----|-----------------------------------------------------------------------------------------------------------------------------------------------------------|---|---|---|---|
| 14. | Is the number of animals (for <i>in vivo</i> studies) or the amount of cell/tissue culture (for <i>in vitro</i> studies) per group provided?              | 1 | 0 | 1 | 1 |
| 15. | Are sufficient details of the administration scheme given to judge the study?                                                                             | 1 | 1 | 1 | 1 |
| 16. | For repeated dose studies: Were achieved concentrations analytically verified or was stability of the test substance otherwise ensured or made plausible? | 0 | 0 | 0 | 0 |
|     | Subtotal score III                                                                                                                                        | 5 | 4 | 5 | 5 |
|     | Criteria group IV: Study results documentation                                                                                                            |   |   |   |   |
| 17. | Are the study endpoint(s) and their method(s) of determination clearly described?                                                                         | 1 | 1 | 1 | 1 |
| 18. | Is the description of the study results for all endpoints investigated transparent and complete?                                                          | 1 | 1 | 1 | 1 |
| 19. | Are the statistical methods for data analysis given and applied in a transparent manner (give also point, if not necessary/applicable, see explanations)? | 1 | 1 | 1 | 1 |
|     | Subtotal score IV                                                                                                                                         | 3 | 3 | 3 | 3 |
|     | Criteria group V: Plausibility of study design and data                                                                                                   |   |   |   |   |
| 20. | Is the study design chosen appropriate for obtaining the substance-specific data aimed at (see explanations for details)?                                 | 1 | 0 | 1 | 1 |

|     |                                                                               |    |    |    |    |
|-----|-------------------------------------------------------------------------------|----|----|----|----|
| 21. | Are the quantitative study results reliable (see explanations for arguments)? | 1  | 1  | 1  | 1  |
|     | Subtotal score V                                                              | 2  | 1  | 2  | 2  |
|     | Total score I-V                                                               | 18 | 13 | 17 | 18 |

Bariani *et al* (8), Deng *et al* (11) and Furuya *et al* (17) are *in vivo* studies, while Novakovic *et al* (31) was an *in vitro* study. For the references, please see the Reference list in the main manuscript.

Table II. Summary of scoring reliability assessment (21,25).

| Quality of study assessment    | Studies included               |                              |                                |                                   |
|--------------------------------|--------------------------------|------------------------------|--------------------------------|-----------------------------------|
|                                | Bariani <i>et al</i> (8), 2017 | Deng <i>et al</i> (11), 2016 | Furuya <i>et al</i> (17), 2015 | Novaković <i>et al</i> (31), 2015 |
| Subtotal score of criteria I   | 4                              | 2                            | 4                              | 4                                 |
| Subtotal score of criteria II  | 4                              | 3                            | 3                              | 4                                 |
| Subtotal score of criteria III | 5                              | 4                            | 5                              | 5                                 |
| Subtotal score of criteria IV  | 3                              | 3                            | 3                              | 3                                 |
| Subtotal score of criteria V   | 2                              | 1                            | 2                              | 2                                 |
| Total score                    | 18                             | 13                           | 17                             | 18                                |
| Reliability classification     | Reliable without restrictions  | Reliable with restrictions   | Reliable with restrictions     | Reliable without restrictions     |

Bariani *et al* (8), Deng *et al* (11) and Furuya *et al* (17) are *in vivo* studies, while Novakovic *et al* (31) was an *in vitro* study. For the references, please see the Reference list in the main manuscript.

Table III. Interpretation of reliability assessment (21,25).

| Reliability categorisation |                |                 |                               | Consequence                                                                                                                                                                |
|----------------------------|----------------|-----------------|-------------------------------|----------------------------------------------------------------------------------------------------------------------------------------------------------------------------|
|                            | <i>In vivo</i> | <i>In vitro</i> | Reliability                   |                                                                                                                                                                            |
| 1                          | 18-21          | 15-18           | Reliable without restrictions | Useful, check relevance for intended purpose                                                                                                                               |
| 2                          | 13-17          | 11-14           | Reliable with restrictions    | Potentially useful, check relevance for intended purpose                                                                                                                   |
| 3                          | <13            | <11             | Not reliable                  | Generally not to be used as key study, but depending on the shortcomings of the study it may still be useful in weight-of-evidence approaches or as supportive information |
